# Supplementary material for: Pitfalls and Challenges in Oral Plasma Cell Mucositis: A Systematic Review
Source: MDPI journal article supplement (doi:10.3390/jcm11216550), 2022-11-04
Supplement: s1 [file s1]

**Table S1.** Oral plasma cell mucositis: a review of literature.

| Study/year of publication | Age/Gender | Symptoms                                                                                                                      | Site of the lesion                                                                  | Description of the lesion                                                                                                               | Comorbidities                                                                                                                                      | Histopathology                                                                                                                                                                       | Immuno-histochemistry |
|---------------------------|------------|-------------------------------------------------------------------------------------------------------------------------------|-------------------------------------------------------------------------------------|-----------------------------------------------------------------------------------------------------------------------------------------|----------------------------------------------------------------------------------------------------------------------------------------------------|--------------------------------------------------------------------------------------------------------------------------------------------------------------------------------------|-----------------------|
| Shanahan et al./ 2020     | 62/F       | <ul style="list-style-type: none"> <li>• Xerostomia</li> <li>• Dysphagia</li> <li>• Hoarseness</li> <li>• Swelling</li> </ul> | <ul style="list-style-type: none"> <li>• Palate</li> <li>• Buccal mucosa</li> </ul> | <ul style="list-style-type: none"> <li>• Erythema</li> <li>• Edema</li> <li>• Ulceration</li> </ul>                                     | <ul style="list-style-type: none"> <li>• Allergic rhinitis</li> <li>• Occasional migraines</li> <li>• Gastro-oesophageal reflux disease</li> </ul> | <ul style="list-style-type: none"> <li>• Dense plasma cell-rich infiltrate</li> </ul>                                                                                                | Normal k:λ ratio      |
| Dhir et al./ 2012         | 28/M       | <ul style="list-style-type: none"> <li>• Swelling</li> <li>• Burning</li> <li>• Bleeding</li> </ul>                           | <ul style="list-style-type: none"> <li>• Gingiva</li> </ul>                         | <ul style="list-style-type: none"> <li>• Gingival hypertrophy</li> <li>• Erythema</li> <li>• Edema</li> <li>• Pseudo-pockets</li> </ul> | NA                                                                                                                                                 | <ul style="list-style-type: none"> <li>• Spongiosis</li> <li>• Psoriasiform epithelial hyperplasia</li> <li>• Leukocytes exocytosis</li> <li>• Neutrophilic micro-abscess</li> </ul> | NA                    |
| Dos Santos et al./ 2019   | 56/M       | <ul style="list-style-type: none"> <li>• Pain</li> </ul>                                                                      | <ul style="list-style-type: none"> <li>• Lip</li> </ul>                             | <ul style="list-style-type: none"> <li>• Ulceration</li> <li>• Secondary impetigo</li> </ul>                                            | <ul style="list-style-type: none"> <li>• Hypertension</li> <li>• Diabetes mellitus</li> </ul>                                                      | <ul style="list-style-type: none"> <li>• Parakeratosis</li> <li>• Dense plasma cell-rich infiltrate</li> <li>• Lymphocytes</li> </ul>                                                | k:λ ratio= λ>k        |

|                                           |      |                                                                                                     |                                                                            |                                                                                                               |                                                                                                                                         |                                                                                                                                                                        |                                            |
|-------------------------------------------|------|-----------------------------------------------------------------------------------------------------|----------------------------------------------------------------------------|---------------------------------------------------------------------------------------------------------------|-----------------------------------------------------------------------------------------------------------------------------------------|------------------------------------------------------------------------------------------------------------------------------------------------------------------------|--------------------------------------------|
|                                           |      |                                                                                                     |                                                                            |                                                                                                               |                                                                                                                                         | <ul style="list-style-type: none"> <li>• Eosinophils</li> <li>• Russell bodies</li> </ul>                                                                              |                                            |
| Kuriyama et al./2019                      | 65/M | <ul style="list-style-type: none"> <li>• Pain</li> <li>• Dysphagia</li> </ul>                       | <ul style="list-style-type: none"> <li>• Lip</li> </ul>                    | <ul style="list-style-type: none"> <li>• Ulceration</li> </ul>                                                | <ul style="list-style-type: none"> <li>• Intellectual disability</li> <li>• Epilepsy</li> <li>• Benign prostatic hypertrophy</li> </ul> | <ul style="list-style-type: none"> <li>• Epithelial hyperplasia</li> <li>• Dense plasma cell-rich infiltrate</li> </ul>                                                | NA                                         |
| Liu et al. /2017                          | 18/F | <ul style="list-style-type: none"> <li>• Swelling</li> <li>• Bleeding</li> <li>• Pain</li> </ul>    | <ul style="list-style-type: none"> <li>• Lip</li> </ul>                    | <ul style="list-style-type: none"> <li>• Erosion</li> <li>• Secondary impetigo</li> <li>• Swelling</li> </ul> | NA                                                                                                                                      | <ul style="list-style-type: none"> <li>• Atrophy</li> <li>• Dense plasma cell-rich infiltrate</li> <li>• Lymphocytes</li> <li>• Neutrophils</li> <li>• IgG+</li> </ul> | Normal k:λ ratio                           |
| Arun et al./2017                          | 13/M | <ul style="list-style-type: none"> <li>• Bleeding</li> <li>• Swelling</li> </ul>                    | <ul style="list-style-type: none"> <li>• Lip</li> <li>• Gingiva</li> </ul> | <ul style="list-style-type: none"> <li>• Erythema</li> <li>• Pseudo-pockets</li> <li>• Swelling</li> </ul>    | NA                                                                                                                                      | <ul style="list-style-type: none"> <li>• Dense plasma cell-rich infiltrate</li> </ul>                                                                                  | k:λ ratio= k>λ                             |
| Panpradit and Lapthanasupkul et al./ 2017 | 35/F | <ul style="list-style-type: none"> <li>• Bleeding</li> <li>• Burning</li> <li>• Swelling</li> </ul> | <ul style="list-style-type: none"> <li>• Gingiva</li> <li>• Lip</li> </ul> | <ul style="list-style-type: none"> <li>• Erythema</li> <li>• Edema</li> <li>• Erosion</li> </ul>              | NA                                                                                                                                      | <ul style="list-style-type: none"> <li>• Epithelial hyperplasia</li> <li>• Spongiosis</li> <li>• Exocytosis</li> </ul>                                                 | DIF: IgG- , IgM +, IgA+, C3+, Fibrinogen+. |

|                    |                |                                                                                                                                                                                                          |                                                                            |                                                                                                                                                                                    |    |                                                                                                                                                                                                                                                            |                    |
|--------------------|----------------|----------------------------------------------------------------------------------------------------------------------------------------------------------------------------------------------------------|----------------------------------------------------------------------------|------------------------------------------------------------------------------------------------------------------------------------------------------------------------------------|----|------------------------------------------------------------------------------------------------------------------------------------------------------------------------------------------------------------------------------------------------------------|--------------------|
|                    |                |                                                                                                                                                                                                          |                                                                            | <ul style="list-style-type: none"> <li>• Swelling</li> </ul>                                                                                                                       |    | <ul style="list-style-type: none"> <li>• Dense plasma cell-rich infiltrate</li> <li>• Lymphocytes</li> </ul>                                                                                                                                               |                    |
| Lee JY et al./2017 | 64.7*/9xM, 4xF | <ul style="list-style-type: none"> <li>• 7x Pricking</li> <li>• 6x Pain</li> <li>• 3x Pruritus</li> <li>• 2x Burning</li> <li>• 9x Bleeding</li> <li>• 1x Asymptomatic</li> <li>• 9x Swelling</li> </ul> | <ul style="list-style-type: none"> <li>• 13x Lip</li> </ul>                | <ul style="list-style-type: none"> <li>• 8x Erythematous plaques</li> <li>• 5x Keratotic plaques</li> <li>• 10x Erosion</li> <li>• 2x Ulceration</li> <li>• 9x Swelling</li> </ul> | NA | <ul style="list-style-type: none"> <li>• 13x Dense plasma cell-rich infiltrate</li> <li>• 9x Eosinophils</li> <li>• 5x Neutrophils</li> <li>• 8x Acanthosis</li> <li>• 4x Edema</li> <li>• 6x Parakeratosis</li> <li>• 8x Vacuolar degeneration</li> </ul> | x 9 k:λ ratio= k>λ |
| Vinay et al./2016  | 38/F           | <ul style="list-style-type: none"> <li>• Pain</li> <li>• Bleeding</li> <li>• Swelling</li> </ul>                                                                                                         | <ul style="list-style-type: none"> <li>• Lip</li> <li>• Gingiva</li> </ul> | <ul style="list-style-type: none"> <li>• Secondary impetigo</li> <li>• Swelling</li> <li>• Erosion</li> </ul>                                                                      | NA | <ul style="list-style-type: none"> <li>• Dense plasma cell-rich infiltrate</li> <li>• Lymphocytes</li> </ul>                                                                                                                                               | Normal k:λ ratio   |

|                        |      |                                                                                                       |                                                                                                     |                                                                                                                                   |                                                                             |                                                                                                                                                                                                                                                                                                         |    |
|------------------------|------|-------------------------------------------------------------------------------------------------------|-----------------------------------------------------------------------------------------------------|-----------------------------------------------------------------------------------------------------------------------------------|-----------------------------------------------------------------------------|---------------------------------------------------------------------------------------------------------------------------------------------------------------------------------------------------------------------------------------------------------------------------------------------------------|----|
| Trehan et al./<br>2016 | 39/M | <ul style="list-style-type: none"> <li>• Pain</li> <li>Dysphagia</li> </ul>                           | <ul style="list-style-type: none"> <li>• Lip</li> <li>• Buccal mucosa</li> <li>• Gingiva</li> </ul> | <ul style="list-style-type: none"> <li>• Erythema</li> <li>• Erosion</li> <li>• Ulceration</li> </ul>                             | <ul style="list-style-type: none"> <li>• Iron-deficiency anaemia</li> </ul> | <ul style="list-style-type: none"> <li>• Dense plasma cell-rich infiltrate</li> </ul>                                                                                                                                                                                                                   | NA |
| Prasanna et al./ 2016  | 19/F | <ul style="list-style-type: none"> <li>• Swelling</li> <li>• Bleeding</li> </ul>                      | <ul style="list-style-type: none"> <li>• Gingiva</li> <li>• Lip</li> </ul>                          | <ul style="list-style-type: none"> <li>• Gingival hypertrophy</li> <li>• Edema</li> <li>• Erythema</li> <li>• Swelling</li> </ul> | NA                                                                          | <ul style="list-style-type: none"> <li>• Pseudo-epitheliomatous hyperplasia</li> <li>• Parakeratosis</li> <li>• Spongiosis</li> <li>• Lymphocytes</li> <li>• Neutrophilic micro-abscess</li> <li>• Dense plasma cell-rich infiltrate</li> <li>• Russel bodies</li> <li>• Dilated capillaries</li> </ul> | NA |
|                        | 15/M | <ul style="list-style-type: none"> <li>• Swelling</li> <li>• Dysphonia</li> <li>• Bleeding</li> </ul> | <ul style="list-style-type: none"> <li>• Gingiva</li> <li>• Lip</li> </ul>                          | <ul style="list-style-type: none"> <li>• Gingival hypertrophy</li> <li>• Swelling</li> </ul>                                      | <ul style="list-style-type: none"> <li>• Sea food allergy</li> </ul>        | <ul style="list-style-type: none"> <li>• Pseudo-epitheliomatous hyperplasia</li> <li>• Parakeratosis</li> <li>• Spongiosis</li> </ul>                                                                                                                                                                   | NA |

|                        |      |                                                                                                                                 |                                                             |                                                                                                                                                                 |                                                                                                               |                                                                                                                                                                                                            |    |
|------------------------|------|---------------------------------------------------------------------------------------------------------------------------------|-------------------------------------------------------------|-----------------------------------------------------------------------------------------------------------------------------------------------------------------|---------------------------------------------------------------------------------------------------------------|------------------------------------------------------------------------------------------------------------------------------------------------------------------------------------------------------------|----|
|                        |      |                                                                                                                                 |                                                             |                                                                                                                                                                 |                                                                                                               | <ul style="list-style-type: none"> <li>• Lymphocytes</li> <li>• Neutrophilic micro-abscess</li> <li>• Dense plasma cell-rich infiltrate</li> <li>• Russel bodies</li> <li>• Dilated capillaries</li> </ul> |    |
| Saluja et al./ 2016    | 25/M | <ul style="list-style-type: none"> <li>• Dysphagia</li> <li>• Swelling</li> <li>• Bilateral cervical lymphadenopathy</li> </ul> | <ul style="list-style-type: none"> <li>• Gingiva</li> </ul> | <ul style="list-style-type: none"> <li>• Gingival hypertrophy</li> <li>• Erythema</li> <li>• Pseudo-pockets</li> <li>• Bone loss</li> <li>• Swelling</li> </ul> | <ul style="list-style-type: none"> <li>• Polyclonal gammopathy</li> <li>• Aggressive periodontitis</li> </ul> | <ul style="list-style-type: none"> <li>• Edema</li> <li>• Dense plasma cell-rich infiltrate</li> <li>• Lymphocytes</li> </ul>                                                                              | NA |
| Yamaguchi et al./ 2016 | 58/M | <ul style="list-style-type: none"> <li>• Pain</li> </ul>                                                                        | <ul style="list-style-type: none"> <li>• Lip</li> </ul>     | <ul style="list-style-type: none"> <li>• Erythema</li> <li>• Ulceration</li> <li>• Secondary impetigo</li> </ul>                                                | NA                                                                                                            | <ul style="list-style-type: none"> <li>• Dense plasma cell-rich infiltrate</li> </ul>                                                                                                                      | NA |

|                        |      |                                                                       |                                                                                                                       |                                                                                                                                                               |                                                                                                                                                                                                                 |                                                                                                                                                     |    |
|------------------------|------|-----------------------------------------------------------------------|-----------------------------------------------------------------------------------------------------------------------|---------------------------------------------------------------------------------------------------------------------------------------------------------------|-----------------------------------------------------------------------------------------------------------------------------------------------------------------------------------------------------------------|-----------------------------------------------------------------------------------------------------------------------------------------------------|----|
| Galvin et al.<br>/2016 | 68/F | <ul style="list-style-type: none"> <li>• Pain</li> </ul>              | <ul style="list-style-type: none"> <li>• Gingiva</li> <li>• Palate</li> <li>• Buccal mucosa</li> </ul>                | <ul style="list-style-type: none"> <li>• Ulceration</li> <li>• Erythema</li> <li>• Desquamati ve gingivitis</li> </ul>                                        | <ul style="list-style-type: none"> <li>• Skin rash</li> <li>• Lichen Planus</li> <li>• Arterial hypertension</li> <li>• Hiatus hernia</li> </ul>                                                                | <ul style="list-style-type: none"> <li>• Dense plasma cell-rich infiltrate</li> </ul>                                                               | NA |
|                        | 61/F | <ul style="list-style-type: none"> <li>• Pain</li> </ul>              | <ul style="list-style-type: none"> <li>• Buccal mucosa</li> <li>• Gingiva</li> </ul>                                  | <ul style="list-style-type: none"> <li>• Edema</li> <li>• Erythema</li> <li>• Ulceration</li> </ul>                                                           | <ul style="list-style-type: none"> <li>• Celiac disease</li> <li>• Hyperlipidemia</li> <li>• Parathyroid adenoma</li> </ul>                                                                                     | <ul style="list-style-type: none"> <li>• Dense plasma cell-rich infiltrate</li> <li>• Acantholysis</li> <li>• Neutrophilic micro-abscess</li> </ul> | NA |
|                        | 69/M | <ul style="list-style-type: none"> <li>• Globus pharyngeus</li> </ul> | <ul style="list-style-type: none"> <li>• Gingiva</li> <li>• Tongue</li> <li>• Palate</li> <li>• Oropharynx</li> </ul> | <ul style="list-style-type: none"> <li>• Desquamati ve gingivitis</li> <li>• Ulceration</li> <li>• Tongue atrophy</li> <li>• Papillary hyperplasia</li> </ul> | <ul style="list-style-type: none"> <li>• Ischemic heart disease</li> <li>• Previous myocardial infarction</li> <li>• Previous prostate cancer</li> <li>• Hypothyroidism</li> <li>• Diabetes mellitus</li> </ul> | <ul style="list-style-type: none"> <li>• Dense plasma cell-rich infiltrate</li> </ul>                                                               | NA |

|                         |      |                                                                                                                         |                                                                                                                       |                                                                                                                      |                                                                                                                                                 |                                                                                                                                                        |                |
|-------------------------|------|-------------------------------------------------------------------------------------------------------------------------|-----------------------------------------------------------------------------------------------------------------------|----------------------------------------------------------------------------------------------------------------------|-------------------------------------------------------------------------------------------------------------------------------------------------|--------------------------------------------------------------------------------------------------------------------------------------------------------|----------------|
| Mukherjee et al./ 2015  | 26/M | <ul style="list-style-type: none"> <li>• Bleeding</li> <li>• Swelling</li> </ul>                                        | <ul style="list-style-type: none"> <li>• Gingiva</li> </ul>                                                           | <ul style="list-style-type: none"> <li>• Gingival hypertrophy</li> <li>• Erythema</li> <li>• Edema</li> </ul>        | NA                                                                                                                                              | <ul style="list-style-type: none"> <li>• Dense plasma cell-rich infiltrate</li> <li>• Epithelial hyperplasia</li> <li>• Elongated rete pegs</li> </ul> | k:λ ratio= k>λ |
| Fujimura et al./ 2015   | 55/F | <ul style="list-style-type: none"> <li>• Swelling</li> <li>• Pain</li> </ul>                                            | <ul style="list-style-type: none"> <li>• Lip</li> </ul>                                                               | <ul style="list-style-type: none"> <li>• Erythema</li> <li>• Swelling</li> </ul>                                     | NA                                                                                                                                              | <ul style="list-style-type: none"> <li>• Dense plasma cell-rich infiltrate</li> <li>• Lymphocytes</li> </ul>                                           | NA             |
| Błazewicz et al./ 2015  | 74/F | <ul style="list-style-type: none"> <li>• Dysphagia</li> <li>• Reduction in mouth opening</li> <li>• Swelling</li> </ul> | <ul style="list-style-type: none"> <li>• Gingiva</li> <li>• Lip</li> <li>• Palate</li> <li>• Buccal mucosa</li> </ul> | <ul style="list-style-type: none"> <li>• Erythema</li> <li>• Edema</li> <li>• Erosion</li> <li>• Swelling</li> </ul> | <ul style="list-style-type: none"> <li>• Arterial hypertension</li> <li>• Diabetes mellitus type 2</li> <li>• Coronary heart disease</li> </ul> | <ul style="list-style-type: none"> <li>• Dense plasma cell-rich infiltrate</li> </ul>                                                                  | NA             |
| Ranganathan et al./2015 | 20/M | <ul style="list-style-type: none"> <li>• Swelling</li> <li>• Bleeding</li> </ul>                                        | <ul style="list-style-type: none"> <li>• Gingiva</li> </ul>                                                           | <ul style="list-style-type: none"> <li>• Erythema</li> </ul>                                                         | NA                                                                                                                                              | <ul style="list-style-type: none"> <li>• Dense plasma cell-rich infiltrate</li> <li>• Epithelial atrophy</li> </ul>                                    | NA             |

|                            |      |                                                                                 |                                                             |                                                                                    |    |                                                                                                                                                                     |                |
|----------------------------|------|---------------------------------------------------------------------------------|-------------------------------------------------------------|------------------------------------------------------------------------------------|----|---------------------------------------------------------------------------------------------------------------------------------------------------------------------|----------------|
| Braga et al.<br>/2016      | 40/F | <ul style="list-style-type: none"> <li>• Asymptomatic</li> </ul>                | <ul style="list-style-type: none"> <li>• Lip</li> </ul>     | <ul style="list-style-type: none"> <li>• Warty lesion</li> </ul>                   | NA | <ul style="list-style-type: none"> <li>• Dense plasma cell-rich infiltrate</li> <li>• Elongated rete ridges</li> <li>• Exocytosis</li> <li>• Eosinophils</li> </ul> | NA             |
| Khatri et al./2014         | 52/M | <ul style="list-style-type: none"> <li>• Bleeding</li> <li>• Burning</li> </ul> | <ul style="list-style-type: none"> <li>• Lip</li> </ul>     | <ul style="list-style-type: none"> <li>• Erythema</li> <li>• Erosion</li> </ul>    | NA | <ul style="list-style-type: none"> <li>• Dense plasma cell-rich infiltrate</li> <li>• Lymphocytes</li> <li>• Neutrophils</li> <li>• Macrophages</li> </ul>          | NA             |
| da Cunha Filho et al./2014 | 58/M | <ul style="list-style-type: none"> <li>• Asymptomatic</li> </ul>                | <ul style="list-style-type: none"> <li>• Lip</li> </ul>     | <ul style="list-style-type: none"> <li>• Ulceration</li> <li>• Erythema</li> </ul> | NA | <ul style="list-style-type: none"> <li>• Dense plasma cell-rich infiltrate</li> <li>• Lymphocytes</li> <li>• Neutrophils</li> <li>• Russell bodies</li> </ul>       | NA             |
| Kumar et al./2015          | 42/M | <ul style="list-style-type: none"> <li>• Pain</li> </ul>                        | <ul style="list-style-type: none"> <li>• Gingiva</li> </ul> | <ul style="list-style-type: none"> <li>• Exophytic and sessile lesion</li> </ul>   | NA | <ul style="list-style-type: none"> <li>• Parakeratosis</li> <li>• Epithelial hyperplasia</li> </ul>                                                                 | k:λ ratio= k>λ |



|                               |      |                                                                                                                                                         |                                                                                                                                                |                                                                                                                                    |                                |                                                                                                                                                                       |                  |
|-------------------------------|------|---------------------------------------------------------------------------------------------------------------------------------------------------------|------------------------------------------------------------------------------------------------------------------------------------------------|------------------------------------------------------------------------------------------------------------------------------------|--------------------------------|-----------------------------------------------------------------------------------------------------------------------------------------------------------------------|------------------|
|                               |      | <ul style="list-style-type: none"> <li>• Reduction in mouth opening</li> <li>• Aesthetic deformities</li> <li>• Bleeding</li> <li>• Swelling</li> </ul> |                                                                                                                                                | <ul style="list-style-type: none"> <li>• Bone loss</li> <li>• Swelling</li> </ul>                                                  |                                | <ul style="list-style-type: none"> <li>• Dense plasma cell-rich infiltrate</li> <li>• Russell bodies</li> </ul>                                                       |                  |
| Gupta et al./2014             | 72/M | <ul style="list-style-type: none"> <li>• Dysphagia</li> <li>• Bleeding</li> <li>• Pain</li> <li>• Burning</li> </ul>                                    | <ul style="list-style-type: none"> <li>• Gingiva</li> <li>• Palate</li> <li>• Oropharynx</li> <li>• Tongue</li> <li>• Buccal mucosa</li> </ul> | <ul style="list-style-type: none"> <li>• Edema</li> <li>• Erythema</li> <li>• Erosion</li> <li>• Cobblestone appearance</li> </ul> | • Benign prostrate hyperplasia | <ul style="list-style-type: none"> <li>• Dense plasma cell-rich infiltrate</li> </ul>                                                                                 | Normal k:λ ratio |
| Madhavarajan and Tighe / 2014 | 63/M | <ul style="list-style-type: none"> <li>• Pain</li> <li>• Bilateral cervical lymphadenopathy</li> </ul>                                                  | <ul style="list-style-type: none"> <li>• Buccal mucosa</li> <li>• Lip</li> <li>• Gingiva</li> </ul>                                            | • Ulceration                                                                                                                       | NA                             | <ul style="list-style-type: none"> <li>• Dense plasma cell-rich infiltrate</li> <li>• Epithelial hyperplasia</li> <li>• Neutrophils</li> <li>• Macrophages</li> </ul> | Normal k:λ ratio |

|                            |      |                                                                                                  |                                                                            |                                                                                                                                    |    |                                                                                                                                                |    |
|----------------------------|------|--------------------------------------------------------------------------------------------------|----------------------------------------------------------------------------|------------------------------------------------------------------------------------------------------------------------------------|----|------------------------------------------------------------------------------------------------------------------------------------------------|----|
| Joshi and Shukla / 2015    | 27/M | <ul style="list-style-type: none"> <li>• Bleeding</li> <li>• Pain</li> <li>• Swelling</li> </ul> | <ul style="list-style-type: none"> <li>• Gingiva</li> </ul>                | <ul style="list-style-type: none"> <li>• Erythema</li> <li>• Bone loss</li> <li>• Swelling</li> </ul>                              | NA | <ul style="list-style-type: none"> <li>• Dense plasma cell-rich infiltrate</li> <li>• Epithelial hyperplasia</li> </ul>                        | NA |
| Yoshimura et al./ 2013     | 62/M | <ul style="list-style-type: none"> <li>• Pain</li> </ul>                                         | <ul style="list-style-type: none"> <li>• Lip</li> </ul>                    | <ul style="list-style-type: none"> <li>• Erosion</li> <li>• Ulceration</li> </ul>                                                  | NA | <ul style="list-style-type: none"> <li>• Dense plasma cell-rich infiltrate</li> <li>• Lymphocytes</li> <li>• Dilated capillaries</li> </ul>    | NA |
| Makkar et al./ 2013        | 17/F | <ul style="list-style-type: none"> <li>• Pain</li> </ul>                                         | <ul style="list-style-type: none"> <li>• Gingiva</li> </ul>                | <ul style="list-style-type: none"> <li>• Gingival hypertrophy</li> <li>• Erythema</li> <li>• Edema</li> <li>• Bone loss</li> </ul> | NA | <ul style="list-style-type: none"> <li>• Epithelial hyperplasia</li> <li>• Dense plasma cell-rich infiltrate</li> <li>• Eosinophils</li> </ul> | NA |
| Abhishek and Rashmi, /2013 | 16/M | <ul style="list-style-type: none"> <li>• Bleeding</li> <li>• Swelling</li> </ul>                 | <ul style="list-style-type: none"> <li>• Lip</li> <li>• Gingiva</li> </ul> | <ul style="list-style-type: none"> <li>• Gingival hypertrophy</li> <li>• Erythema</li> </ul>                                       | NA | <ul style="list-style-type: none"> <li>• Dense plasma cell-rich infiltrate</li> <li>• Lymphocytes</li> </ul>                                   | NA |

|                          |      |                                                                                                  |                                                             |                                                                                                                                    |                                                                                          |                                                                                                                                                                                                                                       |                  |
|--------------------------|------|--------------------------------------------------------------------------------------------------|-------------------------------------------------------------|------------------------------------------------------------------------------------------------------------------------------------|------------------------------------------------------------------------------------------|---------------------------------------------------------------------------------------------------------------------------------------------------------------------------------------------------------------------------------------|------------------|
|                          |      |                                                                                                  |                                                             | <ul style="list-style-type: none"> <li>• Pseudo pockets</li> <li>• Swelling</li> </ul>                                             |                                                                                          |                                                                                                                                                                                                                                       |                  |
| Parashis et al./<br>2015 | 32/M | <ul style="list-style-type: none"> <li>• Bleeding</li> <li>• Burning</li> </ul>                  | <ul style="list-style-type: none"> <li>• Gingiva</li> </ul> | <ul style="list-style-type: none"> <li>• Gingival hypertrophy</li> <li>• Edema</li> <li>• Erythema</li> <li>• Bone loss</li> </ul> | <ul style="list-style-type: none"> <li>• Generalized aggressive periodontitis</li> </ul> | <ul style="list-style-type: none"> <li>• Dense plasma cell-rich infiltrate</li> <li>• Parakeratosis</li> <li>• Spongiosis</li> <li>• Exocytosis</li> <li>• Elongated rete pegs</li> </ul>                                             | Normal k:λ ratio |
| Swati et al./<br>2014    | 21/F | <ul style="list-style-type: none"> <li>• Pain</li> <li>• Bleeding</li> <li>• Swelling</li> </ul> | <ul style="list-style-type: none"> <li>• Gingiva</li> </ul> | <ul style="list-style-type: none"> <li>• Erythema</li> <li>• Edema</li> </ul>                                                      | NA                                                                                       | <ul style="list-style-type: none"> <li>• Dense plasma cell-rich infiltrate</li> <li>• Epithelial hyperplasia</li> <li>• Parakeratosis</li> <li>• Elongated rete pegs</li> <li>• Lymphocytes</li> <li>• Dilated capillaries</li> </ul> | NA               |

|                              |      |                                                                                  |                                                             |                                                                                                                                          |    |                                                                                                                                                                                                |    |
|------------------------------|------|----------------------------------------------------------------------------------|-------------------------------------------------------------|------------------------------------------------------------------------------------------------------------------------------------------|----|------------------------------------------------------------------------------------------------------------------------------------------------------------------------------------------------|----|
|                              | 28/M | <ul style="list-style-type: none"> <li>• Bleeding</li> <li>• Swelling</li> </ul> | <ul style="list-style-type: none"> <li>• Gingiva</li> </ul> | <ul style="list-style-type: none"> <li>• Edema</li> <li>Erythema</li> <li>• Desquamative gingivitis</li> <li>• Pseudo-pockets</li> </ul> | NA | <ul style="list-style-type: none"> <li>• Dense plasma cell-rich infiltrate</li> </ul>                                                                                                          | NA |
|                              | 30/F | <ul style="list-style-type: none"> <li>• Bleeding</li> </ul>                     | <ul style="list-style-type: none"> <li>• Gingiva</li> </ul> | <ul style="list-style-type: none"> <li>• Edema</li> <li>• Erythema</li> </ul>                                                            | NA | <ul style="list-style-type: none"> <li>• Dense plasma cell-rich infiltrate</li> </ul>                                                                                                          | NA |
| Lamdari and Pradhan al./2012 | 29/F | <ul style="list-style-type: none"> <li>• Bleeding</li> <li>• Swelling</li> </ul> | <ul style="list-style-type: none"> <li>• Gingiva</li> </ul> | <ul style="list-style-type: none"> <li>• Erythema</li> <li>• Swelling</li> </ul>                                                         | NA | <ul style="list-style-type: none"> <li>• Dense plasma cell-rich infiltrate</li> <li>• Edema</li> <li>• Epithelial hyperplasia</li> <li>• Lymphocytes</li> <li>• Dilated capillaries</li> </ul> | NA |
| Bali et al./ 2012            | 48/F | <ul style="list-style-type: none"> <li>• Bleeding</li> <li>• Swelling</li> </ul> | <ul style="list-style-type: none"> <li>• Gingiva</li> </ul> | <ul style="list-style-type: none"> <li>• Erythema</li> </ul>                                                                             | NA | <ul style="list-style-type: none"> <li>• Dense plasma cell-rich infiltrate</li> </ul>                                                                                                          | NA |

|                         |      |                                                                                                  |                                                                            |                                                                                                                                               |                                                                                                                         |                                                                                                                                                    |    |
|-------------------------|------|--------------------------------------------------------------------------------------------------|----------------------------------------------------------------------------|-----------------------------------------------------------------------------------------------------------------------------------------------|-------------------------------------------------------------------------------------------------------------------------|----------------------------------------------------------------------------------------------------------------------------------------------------|----|
|                         |      |                                                                                                  |                                                                            |                                                                                                                                               |                                                                                                                         | <ul style="list-style-type: none"> <li>• Atrophy</li> </ul>                                                                                        |    |
| Janam et al./<br>2012   | 15/F | <ul style="list-style-type: none"> <li>• Swelling</li> <li>• Bleeding</li> </ul>                 | <ul style="list-style-type: none"> <li>• Gingiva</li> <li>• Lip</li> </ul> | <ul style="list-style-type: none"> <li>• Warty lesion</li> <li>• Gingival hypertrophy</li> <li>• Fissured lips</li> <li>• Swelling</li> </ul> | NA                                                                                                                      | <ul style="list-style-type: none"> <li>• Dense plasma cell-rich infiltrate</li> <li>• Epithelial hyperplasia</li> <li>• Parakeratosis</li> </ul>   | NA |
| Wood et al./<br>2012    | 70/F | <ul style="list-style-type: none"> <li>• Bleeding</li> </ul>                                     | <ul style="list-style-type: none"> <li>• Gingiva</li> </ul>                | <ul style="list-style-type: none"> <li>• Gingival hypertrophy</li> <li>• Erythema</li> <li>• Pseudo-pockets</li> </ul>                        | <ul style="list-style-type: none"> <li>• Diffuse peripheral odontogenic fibroma</li> <li>• Diabetes mellitus</li> </ul> | <ul style="list-style-type: none"> <li>• Dense plasma cell-rich infiltrate</li> <li>• Spongiosis</li> <li>• Exocytosis</li> <li>• Edema</li> </ul> | NA |
| Agarwal et al./<br>2012 | 28/F | <ul style="list-style-type: none"> <li>• Pain</li> <li>• Bleeding</li> <li>• Swelling</li> </ul> | <ul style="list-style-type: none"> <li>• Gingiva</li> </ul>                | <ul style="list-style-type: none"> <li>• Gingival hypertrophy</li> <li>• Edema</li> <li>• Erythema</li> <li>• Bone loss</li> </ul>            | <ul style="list-style-type: none"> <li>• Allergy to clove</li> </ul>                                                    | <ul style="list-style-type: none"> <li>• Dense plasma cell-rich infiltrate</li> <li>• Epithelial hyperplasia</li> </ul>                            | NA |
| Shruthi et al./<br>2011 | 57/F | <ul style="list-style-type: none"> <li>• Swelling</li> </ul>                                     | <ul style="list-style-type: none"> <li>• Alveolar mucosa</li> </ul>        | <ul style="list-style-type: none"> <li>• Exophytic and sessile lesion</li> </ul>                                                              | NA                                                                                                                      | <ul style="list-style-type: none"> <li>• Dense plasma cell-rich infiltrate</li> </ul>                                                              | NA |

|                     |      |                                                                                  |                                                             |                                                                                                               |    |                                                                                                                               |                  |
|---------------------|------|----------------------------------------------------------------------------------|-------------------------------------------------------------|---------------------------------------------------------------------------------------------------------------|----|-------------------------------------------------------------------------------------------------------------------------------|------------------|
|                     |      |                                                                                  |                                                             | <ul style="list-style-type: none"> <li>• Bone loss</li> </ul>                                                 |    | <ul style="list-style-type: none"> <li>• Epithelial hyperplasia</li> <li>• Parakeratosis</li> <li>• Russell bodies</li> </ul> |                  |
| Anil / 2007         | 27/F | <ul style="list-style-type: none"> <li>• Swelling</li> <li>• Bleeding</li> </ul> | <ul style="list-style-type: none"> <li>• Gingiva</li> </ul> | <ul style="list-style-type: none"> <li>• Erythema</li> <li>• Edema</li> </ul>                                 | NA | <ul style="list-style-type: none"> <li>• Dense plasma cell-rich infiltrate</li> </ul>                                         | NA               |
|                     | 26/M | <ul style="list-style-type: none"> <li>• Bleeding</li> </ul>                     | <ul style="list-style-type: none"> <li>• Gingiva</li> </ul> | <ul style="list-style-type: none"> <li>• Erythema</li> <li>• Edema</li> </ul>                                 | NA | <ul style="list-style-type: none"> <li>• Dense plasma cell-rich infiltrate</li> </ul>                                         | NA               |
| Hanami et al./ 2011 | 66/M | <ul style="list-style-type: none"> <li>• Asymptomatic</li> </ul>                 | <ul style="list-style-type: none"> <li>• Lip</li> </ul>     | <ul style="list-style-type: none"> <li>• Erythema</li> <li>• Erosion</li> </ul>                               | NA | <ul style="list-style-type: none"> <li>• Dense plasma cell-rich infiltrate</li> <li>• IgG+</li> </ul>                         | Normal k:λ ratio |
|                     | 71/M | <ul style="list-style-type: none"> <li>• Asymptomatic</li> </ul>                 | <ul style="list-style-type: none"> <li>• Lip</li> </ul>     | <ul style="list-style-type: none"> <li>• Erythema</li> <li>• Erosion</li> <li>• Secondary impetigo</li> </ul> | NA | <ul style="list-style-type: none"> <li>• Dense plasma cell-rich infiltrate</li> <li>• IgG+</li> </ul>                         | Normal k:λ ratio |

|                         |              |                                                                                                  |                                                                 |                                                                                                                                 |    |                                                                                                                                                                                                                                                |                  |
|-------------------------|--------------|--------------------------------------------------------------------------------------------------|-----------------------------------------------------------------|---------------------------------------------------------------------------------------------------------------------------------|----|------------------------------------------------------------------------------------------------------------------------------------------------------------------------------------------------------------------------------------------------|------------------|
| Arduino et al./<br>2011 | 11*/6xM, 5xF | <ul style="list-style-type: none"> <li>• 11x Pain</li> <li>• Bleeding</li> </ul>                 | <ul style="list-style-type: none"> <li>• 11x Gingiva</li> </ul> | <ul style="list-style-type: none"> <li>• Erythema</li> <li>• Edema</li> </ul>                                                   | NA | <ul style="list-style-type: none"> <li>• Dense plasma</li> <li>• cell-rich infiltrate</li> </ul>                                                                                                                                               | Normal k:λ ratio |
| Patil<br>et al./ 2010   | 29/M         | <ul style="list-style-type: none"> <li>• Pain</li> <li>• Swelling</li> <li>• Bleeding</li> </ul> | <ul style="list-style-type: none"> <li>• Gingiva</li> </ul>     | <ul style="list-style-type: none"> <li>• Erythema</li> <li>• Pseudo pockets</li> <li>• Bone loss</li> <li>• Swelling</li> </ul> | NA | <ul style="list-style-type: none"> <li>• Dense plasma</li> <li>• cell-rich infiltrate</li> <li>• Epithelial hyperplasia</li> <li>• Exocytosis</li> <li>• Edema</li> <li>• Neutrophils</li> <li>• Lymphocytes</li> <li>• Eosinophils</li> </ul> | NA               |
| Saruya et al./<br>2009  | 49/M         | <ul style="list-style-type: none"> <li>• Asymptomatic</li> </ul>                                 | <ul style="list-style-type: none"> <li>• Lip</li> </ul>         | <ul style="list-style-type: none"> <li>• Erosion</li> <li>• Secondary impetigo</li> </ul>                                       | NA | <ul style="list-style-type: none"> <li>• Dense plasma</li> <li>• cell-rich infiltrate</li> <li>• Lymphocytes</li> <li>• Dilated capillaries</li> </ul>                                                                                         | NA               |
| Choi et al./<br>2009    | 66/F         | <ul style="list-style-type: none"> <li>• Bleeding</li> </ul>                                     | <ul style="list-style-type: none"> <li>• Lip</li> </ul>         | <ul style="list-style-type: none"> <li>• Erosion</li> <li>• Secondary impetigo</li> </ul>                                       | NA | <ul style="list-style-type: none"> <li>• Dense plasma</li> <li>• cell-rich infiltrate</li> </ul>                                                                                                                                               | NA               |

|                         |      |                                                                                                                                         |                                                                                                                                         |                                                                                                                                                              |                                                                                                                                                                                         |                                                                                                                                                 |                                   |
|-------------------------|------|-----------------------------------------------------------------------------------------------------------------------------------------|-----------------------------------------------------------------------------------------------------------------------------------------|--------------------------------------------------------------------------------------------------------------------------------------------------------------|-----------------------------------------------------------------------------------------------------------------------------------------------------------------------------------------|-------------------------------------------------------------------------------------------------------------------------------------------------|-----------------------------------|
|                         | 68/M | <ul style="list-style-type: none"> <li>• Pain</li> <li>• Bleeding</li> </ul>                                                            | <ul style="list-style-type: none"> <li>• Lip</li> </ul>                                                                                 | <ul style="list-style-type: none"> <li>• Ulceration</li> <li>• Secondary impetigo</li> </ul>                                                                 | NA                                                                                                                                                                                      | <ul style="list-style-type: none"> <li>• Dense plasma cell-rich infiltrate</li> </ul>                                                           | NA                                |
|                         | 65/F | <ul style="list-style-type: none"> <li>• Pain</li> <li>• Bleeding</li> </ul>                                                            | <ul style="list-style-type: none"> <li>• Lip</li> </ul>                                                                                 | <ul style="list-style-type: none"> <li>• Ulceration</li> <li>• Secondary impetigo</li> </ul>                                                                 | NA                                                                                                                                                                                      | <ul style="list-style-type: none"> <li>• Dense plasma cell-rich infiltrate</li> </ul>                                                           | NA                                |
| Solomon et al.<br>/2008 | 60/F | <ul style="list-style-type: none"> <li>• Pain</li> <li>• Dysphagia</li> <li>• Reduction in mouth opening</li> <li>• Swelling</li> </ul> | <ul style="list-style-type: none"> <li>• Gingiva</li> <li>• Tongue</li> <li>• Palate</li> <li>• Lip</li> <li>• Buccal mucosa</li> </ul> | <ul style="list-style-type: none"> <li>• Fissured tongue</li> <li>• Erythema</li> <li>• Erosion</li> <li>• Swelling</li> <li>• Small pink papules</li> </ul> | <ul style="list-style-type: none"> <li>• Fibromyalgia</li> <li>• Sjögren syndrome</li> <li>• Diabetes mellitus type 2</li> <li>• Arterial hypertension</li> <li>• Osteopenia</li> </ul> | <ul style="list-style-type: none"> <li>• Dense plasma cell-rich infiltrate</li> <li>• IgG+</li> </ul>                                           | $k:\lambda$ ratio = $k > \lambda$ |
| Rawal et al./<br>2008   | 40/M | <ul style="list-style-type: none"> <li>• Pain</li> <li>• Bleeding</li> <li>• Swelling</li> </ul>                                        | <ul style="list-style-type: none"> <li>• Gingiva</li> <li>• Buccal mucosa</li> </ul>                                                    | <ul style="list-style-type: none"> <li>• Edema</li> <li>• Erythema</li> <li>• Ulceration</li> <li>• Bone loss</li> <li>• Swelling</li> </ul>                 | NA                                                                                                                                                                                      | <ul style="list-style-type: none"> <li>• Dense plasma cell-rich infiltrate</li> <li>• Atrophy</li> <li>• Edema</li> <li>• Exocytosis</li> </ul> | NA                                |



|                          |      |                                                                                                                            |                                                                                                                    |                                                                                           |                                                                                                               |                                                                                                                                                        |                                   |
|--------------------------|------|----------------------------------------------------------------------------------------------------------------------------|--------------------------------------------------------------------------------------------------------------------|-------------------------------------------------------------------------------------------|---------------------------------------------------------------------------------------------------------------|--------------------------------------------------------------------------------------------------------------------------------------------------------|-----------------------------------|
| Najarian et al./2008     | 56/M | <ul style="list-style-type: none"> <li>• Bleeding</li> <li>• Pain</li> </ul>                                               | <ul style="list-style-type: none"> <li>• Lip</li> </ul>                                                            | <ul style="list-style-type: none"> <li>• Erosion</li> <li>• Secondary Impetigo</li> </ul> | <ul style="list-style-type: none"> <li>• Acquired immunodeficiency syndrome</li> <li>• Hepatitis C</li> </ul> | <ul style="list-style-type: none"> <li>• Edema</li> <li>• Dense plasma cell-rich infiltrate</li> <li>• Dilated capillaries</li> </ul>                  | $k:\lambda$ ratio = $k > \lambda$ |
| Senol et al./2008        | 46/M | <ul style="list-style-type: none"> <li>• Pain</li> </ul>                                                                   | <ul style="list-style-type: none"> <li>• Buccal mucosa</li> </ul>                                                  | <ul style="list-style-type: none"> <li>• Erythema</li> </ul>                              | NA                                                                                                            | <ul style="list-style-type: none"> <li>• Dense plasma cell-rich infiltrate</li> <li>• Acanthosis</li> <li>• Russell bodies</li> <li>• Edema</li> </ul> | Normal $k:\lambda$ ratio          |
| Farrier and Perkins/2008 | 53/F | <ul style="list-style-type: none"> <li>• Swelling</li> </ul>                                                               | <ul style="list-style-type: none"> <li>• Lip</li> </ul>                                                            | <ul style="list-style-type: none"> <li>• Secondary Impetigo</li> </ul>                    | NA                                                                                                            | <ul style="list-style-type: none"> <li>• Dense plasma cell-rich infiltrate</li> </ul>                                                                  | $k:\lambda$ ratio = $k > \lambda$ |
| Tong et al./2007         | 59/M | <ul style="list-style-type: none"> <li>• Hoarseness</li> <li>• Xerostomia</li> <li>• Dysphagia</li> <li>• Cough</li> </ul> | <ul style="list-style-type: none"> <li>• Buccal mucosa</li> <li>• Alveolar mucosa</li> <li>• Oropharynx</li> </ul> | <ul style="list-style-type: none"> <li>• Edema</li> <li>• Erythema</li> </ul>             | NA                                                                                                            | <ul style="list-style-type: none"> <li>• Dense plasma cell-rich infiltrate</li> </ul>                                                                  | Normal $k:\lambda$ ratio          |

|                        |      |                                                                                                  |                                                                                                    |                                                                                                                |                                                                     |                                                                                                                                                                                                                                 |                  |
|------------------------|------|--------------------------------------------------------------------------------------------------|----------------------------------------------------------------------------------------------------|----------------------------------------------------------------------------------------------------------------|---------------------------------------------------------------------|---------------------------------------------------------------------------------------------------------------------------------------------------------------------------------------------------------------------------------|------------------|
| Tseng et al./2009      | 55/F | <ul style="list-style-type: none"> <li>• Swelling</li> <li>• Pain</li> <li>• Bleeding</li> </ul> | <ul style="list-style-type: none"> <li>• Lip</li> </ul>                                            | <ul style="list-style-type: none"> <li>• Erythema</li> <li>• Secondary impetigo</li> <li>• Swelling</li> </ul> | NA                                                                  | <ul style="list-style-type: none"> <li>• Dense plasma cell-rich infiltrate</li> <li>• Eosinophils</li> <li>• Macrophages</li> </ul>                                                                                             | Normal k:λ ratio |
| Heinemann et al./ 2006 | 61/F | <ul style="list-style-type: none"> <li>• Pain</li> </ul>                                         | <ul style="list-style-type: none"> <li>• Tongue</li> <li>• Lip</li> <li>• Buccal mucosa</li> </ul> | <ul style="list-style-type: none"> <li>• Erythema</li> <li>• Erosion/Ulcration</li> </ul>                      | <ul style="list-style-type: none"> <li>• Hypertonia</li> </ul>      | <ul style="list-style-type: none"> <li>• Dense plasma cell-rich infiltrate</li> <li>• Pseudo-epitheliomatous hyperplasia</li> </ul>                                                                                             | NA               |
| Yang et al./2005       | 56/M | <ul style="list-style-type: none"> <li>• Pain</li> </ul>                                         | <ul style="list-style-type: none"> <li>• Lip</li> </ul>                                            | <ul style="list-style-type: none"> <li>• Erythema</li> <li>• Erosion</li> <li>• Secondary impetigo</li> </ul>  | <ul style="list-style-type: none"> <li>• Liver cirrhosis</li> </ul> | <ul style="list-style-type: none"> <li>• Dense plasma cell-rich infiltrate</li> <li>• Parakeratosis</li> <li>• Edema</li> <li>• Atrophy</li> <li>• Dilated capillaries</li> <li>• Neutrophils</li> <li>• Lymphocytes</li> </ul> | NA               |

|                        |      |                                                                                  |                                                                                     |                                                                                                               |                                                                                                    |                                                                                                                                                                                      |                  |
|------------------------|------|----------------------------------------------------------------------------------|-------------------------------------------------------------------------------------|---------------------------------------------------------------------------------------------------------------|----------------------------------------------------------------------------------------------------|--------------------------------------------------------------------------------------------------------------------------------------------------------------------------------------|------------------|
|                        | 69/F | <ul style="list-style-type: none"> <li>• Pain</li> </ul>                         | <ul style="list-style-type: none"> <li>• Lip</li> </ul>                             | <ul style="list-style-type: none"> <li>• Erythema</li> <li>• Erosion</li> <li>• Secondary impetigo</li> </ul> | NA                                                                                                 | <ul style="list-style-type: none"> <li>• Dense plasma cell-rich infiltrate</li> <li>• Parakeratosis</li> </ul>                                                                       | NA               |
|                        | 63/F | <ul style="list-style-type: none"> <li>• Pain</li> </ul>                         | <ul style="list-style-type: none"> <li>• Lip</li> </ul>                             | <ul style="list-style-type: none"> <li>• Erythema</li> <li>• Erosion</li> </ul>                               | NA                                                                                                 | <ul style="list-style-type: none"> <li>• Dense plasma cell-rich infiltrate</li> </ul>                                                                                                | NA               |
| Bharti and Smith/ 2003 | 42/F | <ul style="list-style-type: none"> <li>• Pain</li> <li>• Dysphagia</li> </ul>    | <ul style="list-style-type: none"> <li>• Buccal mucosa</li> <li>• Palate</li> </ul> | <ul style="list-style-type: none"> <li>• Cobblestone appearance</li> </ul>                                    | NA                                                                                                 | <ul style="list-style-type: none"> <li>• Dense plasma cell-rich infiltrate</li> <li>• Neutrophils</li> <li>• Eosinophils</li> <li>• Lymphocytes</li> <li>• Russell bodies</li> </ul> | NA               |
| Roman et al./2002      | 13/F | <ul style="list-style-type: none"> <li>• Swelling</li> <li>• Bleeding</li> </ul> | <ul style="list-style-type: none"> <li>• Gingiva</li> </ul>                         | <ul style="list-style-type: none"> <li>• Erythematous plaque</li> </ul>                                       | <ul style="list-style-type: none"> <li>• Low levels of both serum IgA and secretory IgA</li> </ul> | <ul style="list-style-type: none"> <li>• Dense plasma cell-rich infiltrate</li> <li>• Epithelial hyperplasia</li> <li>• Acanthosis</li> <li>• Atrophy</li> </ul>                     | Normal k:λ ratio |

|                          |      |                                                                                                    |                                                                                      |                                                                                                                             |    |                                                                                                                                                                                                                                                                                |                  |
|--------------------------|------|----------------------------------------------------------------------------------------------------|--------------------------------------------------------------------------------------|-----------------------------------------------------------------------------------------------------------------------------|----|--------------------------------------------------------------------------------------------------------------------------------------------------------------------------------------------------------------------------------------------------------------------------------|------------------|
| Marker and Krogdahl/2002 | 30/M | <ul style="list-style-type: none"> <li>• Pain</li> <li>• Swelling</li> </ul>                       | <ul style="list-style-type: none"> <li>• Gingiva</li> <li>• Buccal mucosa</li> </ul> | <ul style="list-style-type: none"> <li>• Erythema</li> <li>• Ulceration</li> <li>• Bone loss</li> <li>• Swelling</li> </ul> | NA | <ul style="list-style-type: none"> <li>• Dense plasma cell-rich infiltrate</li> <li>• Psoriasiform epithelial hyperplasia</li> <li>• Exocytosis</li> <li>• Spongiosis</li> <li>• Dilated capillaries</li> <li>• Neutrophils</li> <li>• Neutrophilic micro-abscesses</li> </ul> | Normal k:λ ratio |
| Kaur et al. /2001        | 47/M | <ul style="list-style-type: none"> <li>• Swelling</li> </ul>                                       | <ul style="list-style-type: none"> <li>• Lip</li> </ul>                              | <ul style="list-style-type: none"> <li>• Erythema</li> <li>• Swelling</li> </ul>                                            | NA | <ul style="list-style-type: none"> <li>• Dense plasma cell-rich infiltrate</li> <li>• Acanthosis</li> <li>• Lymphocytes</li> </ul>                                                                                                                                             | NA               |
| Fogarty et al. /2001     | 27/F | <ul style="list-style-type: none"> <li>• Pain</li> <li>• Hoarseness</li> <li>• Swelling</li> </ul> | <ul style="list-style-type: none"> <li>• Gingiva</li> <li>• Oropharynx</li> </ul>    | <ul style="list-style-type: none"> <li>• Edema</li> <li>• Swelling</li> </ul>                                               | NA | <ul style="list-style-type: none"> <li>• Dense plasma cell-rich infiltrate</li> </ul>                                                                                                                                                                                          | Normal k:λ ratio |

|                    |      |                                                                                    |                                                                                                                      |                                                                                                       |                                                                                                                                              |                                                                                                                                         |                  |
|--------------------|------|------------------------------------------------------------------------------------|----------------------------------------------------------------------------------------------------------------------|-------------------------------------------------------------------------------------------------------|----------------------------------------------------------------------------------------------------------------------------------------------|-----------------------------------------------------------------------------------------------------------------------------------------|------------------|
|                    |      |                                                                                    |                                                                                                                      |                                                                                                       |                                                                                                                                              | <ul style="list-style-type: none"> <li>• Pseudo-epitheliomatous hyperplasia</li> <li>• IgG+</li> </ul>                                  |                  |
| Rocha et al./2004  | 60/F | <ul style="list-style-type: none"> <li>• Bleeding</li> <li>• Pain</li> </ul>       | <ul style="list-style-type: none"> <li>• Lip</li> </ul>                                                              | <ul style="list-style-type: none"> <li>• Erythema</li> <li>• Secondary Impetigo</li> </ul>            | <ul style="list-style-type: none"> <li>• Pulmonary tuberculosis</li> <li>• Nephrolithiasis</li> </ul>                                        | <ul style="list-style-type: none"> <li>• Dense plasma cell-rich infiltrate</li> <li>• Papillar epithelial hyperplasia</li> </ul>        | NA               |
| Smith et al./1999  | 59/M | <ul style="list-style-type: none"> <li>• Hoarseness</li> <li>• Swelling</li> </ul> | <ul style="list-style-type: none"> <li>• Palate</li> <li>• Oropharynx</li> <li>• Gingiva</li> </ul>                  | <ul style="list-style-type: none"> <li>• Erythematous plaques</li> <li>• Gingival erythema</li> </ul> | <ul style="list-style-type: none"> <li>• Coeliac disease</li> <li>• Dermatitis herpetiformis</li> </ul>                                      | <ul style="list-style-type: none"> <li>• Epithelial hyperplasia</li> <li>• Dense plasma cell-rich infiltrate</li> <li>• IgG+</li> </ul> | NA               |
| Lee MS et al./1996 | 84/F | <ul style="list-style-type: none"> <li>• Xerostomia</li> <li>• Pain</li> </ul>     | <ul style="list-style-type: none"> <li>• Palate</li> <li>• Tongue</li> <li>• Buccal mucosa</li> <li>• Lip</li> </ul> | <ul style="list-style-type: none"> <li>• Warty lesions</li> </ul>                                     | <ul style="list-style-type: none"> <li>• Previous carcinoma of the colon</li> <li>• Thyrotoxicosis</li> <li>• Atrial fibrillation</li> </ul> | <ul style="list-style-type: none"> <li>• Pseudo-epitheliomatous hyperplasia</li> <li>• Dense plasma cell-rich infiltrate</li> </ul>     | Normal k:λ ratio |

|                                  |      |                                                          |                                                             |                                                                                        |                                                                                                                                     |                                                                                                                                                                 |                  |
|----------------------------------|------|----------------------------------------------------------|-------------------------------------------------------------|----------------------------------------------------------------------------------------|-------------------------------------------------------------------------------------------------------------------------------------|-----------------------------------------------------------------------------------------------------------------------------------------------------------------|------------------|
|                                  |      |                                                          |                                                             |                                                                                        | <ul style="list-style-type: none"> <li>• Coronary artery disease</li> <li>• Previous artery cerebro-vascular accident</li> </ul>    | <ul style="list-style-type: none"> <li>• Lymphocytes</li> <li>• Eosinophils</li> <li>• Neutrophils</li> </ul>                                                   |                  |
| Mahler et al./1996               | 53/F | <ul style="list-style-type: none"> <li>• Pain</li> </ul> | <ul style="list-style-type: none"> <li>• Gingiva</li> </ul> | <ul style="list-style-type: none"> <li>• Erythema</li> </ul>                           | NA                                                                                                                                  | <ul style="list-style-type: none"> <li>• Dense plasma cell-rich infiltrate</li> <li>• Lymphocytes</li> <li>• IgG+ (90%)</li> <li>• IgA+ IgM+ &lt; 5%</li> </ul> | Normal k:λ ratio |
| van de Kerkhof and van Baar/1995 | 80/F | <ul style="list-style-type: none"> <li>• Pain</li> </ul> | <ul style="list-style-type: none"> <li>• Lip</li> </ul>     | <ul style="list-style-type: none"> <li>• Erythema,</li> <li>• Fissured lips</li> </ul> | <ul style="list-style-type: none"> <li>• Total hip replacement</li> <li>• Venous leg ulceration</li> <li>• Heart failure</li> </ul> | <ul style="list-style-type: none"> <li>• Dense plasma cell-rich infiltrate</li> <li>• Acanthosis</li> <li>• Spongiosis</li> <li>• Lymphocytes</li> </ul>        | NA               |
| Tamaki et al./1994               | 56/M | <ul style="list-style-type: none"> <li>• Pain</li> </ul> | <ul style="list-style-type: none"> <li>• Lip</li> </ul>     | <ul style="list-style-type: none"> <li>• Erythema</li> <li>• Erosion</li> </ul>        | NA                                                                                                                                  | <ul style="list-style-type: none"> <li>• Parakeratosis</li> <li>• Edema</li> </ul>                                                                              | NA               |

|                               |      |                                                                              |                                                                            |                                                                                                                                    |                                                                                                          |                                                                                                                              |    |
|-------------------------------|------|------------------------------------------------------------------------------|----------------------------------------------------------------------------|------------------------------------------------------------------------------------------------------------------------------------|----------------------------------------------------------------------------------------------------------|------------------------------------------------------------------------------------------------------------------------------|----|
|                               |      |                                                                              |                                                                            |                                                                                                                                    |                                                                                                          | <ul style="list-style-type: none"> <li>• Dense plasma cell-rich infiltrate</li> </ul>                                        |    |
|                               | 71/M | <ul style="list-style-type: none"> <li>• Pain</li> </ul>                     | <ul style="list-style-type: none"> <li>• Lip</li> </ul>                    | <ul style="list-style-type: none"> <li>• Erythema</li> <li>• Erosion</li> </ul>                                                    | NA                                                                                                       | <ul style="list-style-type: none"> <li>• Acanthosis</li> <li>• Edema</li> <li>• Dense plasma cell-rich infiltrate</li> </ul> | NA |
| Reed et al./1993              | 37/F | <ul style="list-style-type: none"> <li>• Pain</li> <li>• Swelling</li> </ul> | <ul style="list-style-type: none"> <li>• Gingiva</li> </ul>                | <ul style="list-style-type: none"> <li>• Gingival hypertrophy</li> <li>• Edema,</li> <li>• Erythema</li> <li>• Swelling</li> </ul> | NA                                                                                                       | <ul style="list-style-type: none"> <li>• Dense plasma cell-rich infiltrate</li> </ul>                                        | NA |
| Sollecito and Greenberg /1992 | 61/F | <ul style="list-style-type: none"> <li>• Swelling</li> </ul>                 | <ul style="list-style-type: none"> <li>• Gingiva</li> <li>• Lip</li> </ul> | <ul style="list-style-type: none"> <li>• Edema</li> <li>• Erythema</li> </ul>                                                      | NA                                                                                                       | <ul style="list-style-type: none"> <li>• Dense plasma cell-rich infiltrate</li> </ul>                                        | NA |
|                               | 62/F | <ul style="list-style-type: none"> <li>• Pain</li> </ul>                     | <ul style="list-style-type: none"> <li>• Gingiva</li> <li>• Lip</li> </ul> | <ul style="list-style-type: none"> <li>• Edema</li> <li>• Erythema</li> </ul>                                                      | <ul style="list-style-type: none"> <li>• Hashimoto's thyroiditis</li> <li>• Mild hypertension</li> </ul> | <ul style="list-style-type: none"> <li>• Dense plasma cell-rich infiltrate</li> </ul>                                        | NA |

|                       |      |                                                                              |                                                                                                 |                                                                                                                               |                                                                                               |                                                                                                                                                                                                            |    |
|-----------------------|------|------------------------------------------------------------------------------|-------------------------------------------------------------------------------------------------|-------------------------------------------------------------------------------------------------------------------------------|-----------------------------------------------------------------------------------------------|------------------------------------------------------------------------------------------------------------------------------------------------------------------------------------------------------------|----|
| Serio et al./<br>1991 | 37/F | <ul style="list-style-type: none"> <li>• Bleeding</li> </ul>                 | <ul style="list-style-type: none"> <li>• Gingiva</li> </ul>                                     | <ul style="list-style-type: none"> <li>• Erythema</li> </ul>                                                                  | NA                                                                                            | <ul style="list-style-type: none"> <li>• Dense plasma cell-rich infiltrate</li> </ul>                                                                                                                      | NA |
| Grattan et al./1992   | 68/M | <ul style="list-style-type: none"> <li>• Swelling</li> </ul>                 | <ul style="list-style-type: none"> <li>• Palate</li> <li>• Lip</li> <li>• Oropharynx</li> </ul> | <ul style="list-style-type: none"> <li>• Papillary hyperplasia</li> <li>• Fissured lips</li> <li>• Swelling</li> </ul>        | <ul style="list-style-type: none"> <li>• Winter bronchitis</li> <li>• Peptic ulcer</li> </ul> | <ul style="list-style-type: none"> <li>• Epithelial hyperplasia</li> <li>• Neutrophilic micro-abscesses</li> <li>• Dense plasma cell-rich infiltrate</li> <li>• IgG+</li> </ul>                            | NA |
|                       | 84/M | <ul style="list-style-type: none"> <li>• Swelling</li> <li>• Pain</li> </ul> | <ul style="list-style-type: none"> <li>• Palate</li> <li>• Tongue</li> <li>• Gingiva</li> </ul> | <ul style="list-style-type: none"> <li>• Erythema</li> <li>• Papillary hyperplasia</li> <li>• Erythematous plaques</li> </ul> | NA                                                                                            | <ul style="list-style-type: none"> <li>• Epithelial hyperplasia</li> <li>• Atrophy</li> <li>• Dense plasma cell-rich infiltrate</li> <li>• Parakeratosis</li> <li>• Neutrophilic microabscesses</li> </ul> | NA |



|                         |      |                                                                                                           |                                                                                                        |                                                                                  |                                                                                                  |                                                                                                                                                                                      |    |
|-------------------------|------|-----------------------------------------------------------------------------------------------------------|--------------------------------------------------------------------------------------------------------|----------------------------------------------------------------------------------|--------------------------------------------------------------------------------------------------|--------------------------------------------------------------------------------------------------------------------------------------------------------------------------------------|----|
|                         |      |                                                                                                           |                                                                                                        |                                                                                  |                                                                                                  | • IgG+                                                                                                                                                                               |    |
| Timms and Sloan,/1991   | 70/F | <ul style="list-style-type: none"> <li>• Cough</li> <li>• Hoarseness</li> </ul>                           | <ul style="list-style-type: none"> <li>• Gingiva</li> <li>• Larynx</li> </ul>                          | <ul style="list-style-type: none"> <li>• Erythema</li> </ul>                     | <ul style="list-style-type: none"> <li>• Seronegative</li> <li>• Rheumatoid arthritis</li> </ul> | <ul style="list-style-type: none"> <li>• Dense plasma cell-rich infiltrate</li> </ul>                                                                                                | NA |
|                         | 32/F | <ul style="list-style-type: none"> <li>• Hoarseness</li> <li>• Sore throat</li> <li>• Swelling</li> </ul> | <ul style="list-style-type: none"> <li>• Gingiva</li> <li>• Larynx</li> <li>• Buccal mucosa</li> </ul> | <ul style="list-style-type: none"> <li>• Erythema</li> <li>• Swelling</li> </ul> | NA                                                                                               | <ul style="list-style-type: none"> <li>• Dense plasma cell-rich infiltrate</li> </ul>                                                                                                | NA |
|                         | 57/M | <ul style="list-style-type: none"> <li>• Sore throat</li> </ul>                                           | <ul style="list-style-type: none"> <li>• Gingiva</li> <li>• Larynx</li> </ul>                          | <ul style="list-style-type: none"> <li>• Erythema</li> </ul>                     | <ul style="list-style-type: none"> <li>• Seronegative</li> <li>• Rheumatoid arthritis</li> </ul> | <ul style="list-style-type: none"> <li>• Dense plasma cell-rich infiltrate</li> </ul>                                                                                                | NA |
| Jones and Kennedy /1988 | 52/F | <ul style="list-style-type: none"> <li>• Pain</li> </ul>                                                  | <ul style="list-style-type: none"> <li>• Lip</li> </ul>                                                | <ul style="list-style-type: none"> <li>• Fissured lips</li> </ul>                | <ul style="list-style-type: none"> <li>• Atopic eczema</li> </ul>                                | <ul style="list-style-type: none"> <li>• Parakeratosis</li> <li>• Acanthosis</li> <li>• Edema</li> <li>• Elongated rete pegs</li> <li>• Dense plasma cell-rich infiltrate</li> </ul> | NA |

|                   |      |                                                                                                              |                                                                                                                         |                                                                                      |                                                                          |                                                                                                                                                                                                                       |                  |
|-------------------|------|--------------------------------------------------------------------------------------------------------------|-------------------------------------------------------------------------------------------------------------------------|--------------------------------------------------------------------------------------|--------------------------------------------------------------------------|-----------------------------------------------------------------------------------------------------------------------------------------------------------------------------------------------------------------------|------------------|
| Timms et al./1988 | 70/F | <ul style="list-style-type: none"> <li>• Cough</li> <li>• Hoarseness</li> </ul>                              | <ul style="list-style-type: none"> <li>• Gingiva</li> <li>• Oropharyn</li> <li>• Palate</li> </ul>                      | <ul style="list-style-type: none"> <li>• Erythema</li> </ul>                         | <ul style="list-style-type: none"> <li>• Rheumatoid arthritis</li> </ul> | <ul style="list-style-type: none"> <li>• Dense plasma cell-rich infiltrate</li> <li>• Pseudo-epitheliomatous hyperplasia</li> <li>• Lymphocytes</li> <li>• Macrophages</li> <li>• IgG+</li> <li>• IgA+IgM+</li> </ul> | Normal k:λ ratio |
| White et al./1986 | 47/F | <ul style="list-style-type: none"> <li>• Pain</li> <li>• Sore throat</li> <li>• Globus pharyngeus</li> </ul> | <ul style="list-style-type: none"> <li>• Buccal mucosa</li> <li>• Oropharyn</li> <li>• Lip</li> <li>• Tongue</li> </ul> | <ul style="list-style-type: none"> <li>• Erythema</li> <li>• Fissured lip</li> </ul> | <ul style="list-style-type: none"> <li>• Psoriasis</li> </ul>            | <ul style="list-style-type: none"> <li>• Acanthosis</li> <li>• Atrophy</li> <li>• Edema</li> <li>• Dense plasma cell-rich infiltrate</li> </ul>                                                                       | Nrmal k:λ ratio  |
| Lubow et al./1984 | 36/M | <ul style="list-style-type: none"> <li>• Pain</li> <li>• Bleeding</li> </ul>                                 | <ul style="list-style-type: none"> <li>• Gingiva</li> </ul>                                                             | <ul style="list-style-type: none"> <li>• Ulceration</li> </ul>                       | <ul style="list-style-type: none"> <li>• Psoriasis</li> </ul>            | <ul style="list-style-type: none"> <li>• Psoriasiform epithelial hyperplasia</li> <li>• Atrophy</li> </ul>                                                                                                            | NA               |

|                        |      |                                                                  |                                                             |                                                              |                                                                                          |                                                                                                                                                                                                                                                            |    |
|------------------------|------|------------------------------------------------------------------|-------------------------------------------------------------|--------------------------------------------------------------|------------------------------------------------------------------------------------------|------------------------------------------------------------------------------------------------------------------------------------------------------------------------------------------------------------------------------------------------------------|----|
|                        |      |                                                                  |                                                             |                                                              |                                                                                          | <ul style="list-style-type: none"> <li>• Dense plasma cell-rich infiltrate</li> </ul>                                                                                                                                                                      |    |
| Palmer and Eveson/1981 | 29/F | <ul style="list-style-type: none"> <li>• Swelling</li> </ul>     | <ul style="list-style-type: none"> <li>• Gingiva</li> </ul> | <ul style="list-style-type: none"> <li>• Erythema</li> </ul> | <ul style="list-style-type: none"> <li>• Asthma</li> </ul>                               | <ul style="list-style-type: none"> <li>• Psoriasiform epithelial hyperplasia</li> <li>• Elongated rete pegs</li> <li>• Atrophy</li> <li>• Spongiosis</li> <li>• Dense plasma cell-rich infiltrate</li> <li>• Neutrophils</li> <li>• Lymphocytes</li> </ul> | NA |
|                        | 52/M | <ul style="list-style-type: none"> <li>• Asymptomatic</li> </ul> | <ul style="list-style-type: none"> <li>• Gingiva</li> </ul> | <ul style="list-style-type: none"> <li>• Erythema</li> </ul> | <ul style="list-style-type: none"> <li>• Psoriasis</li> <li>• Paget's disease</li> </ul> | <ul style="list-style-type: none"> <li>• Psoriasiform epithelial hyperplasia</li> <li>• Elongated rete pegs</li> <li>• Atrophy</li> <li>• Spongiosis</li> </ul>                                                                                            | NA |

|                            |                 |                                                                                     |                                                                                                                                                                                                                 |                                                                                                   |                                                                                                                                                                                             |                                                                                                                                                                                        |    |
|----------------------------|-----------------|-------------------------------------------------------------------------------------|-----------------------------------------------------------------------------------------------------------------------------------------------------------------------------------------------------------------|---------------------------------------------------------------------------------------------------|---------------------------------------------------------------------------------------------------------------------------------------------------------------------------------------------|----------------------------------------------------------------------------------------------------------------------------------------------------------------------------------------|----|
|                            |                 |                                                                                     |                                                                                                                                                                                                                 |                                                                                                   |                                                                                                                                                                                             | <ul style="list-style-type: none"> <li>• Dense plasma cell-rich infiltrate</li> <li>• Neutrophils</li> <li>• Lymphocytes</li> </ul>                                                    |    |
| Silverman and Lozada /1977 | 42,5*/12xF, 4xM | <ul style="list-style-type: none"> <li>• x9 Bleeding</li> <li>• x16 Pain</li> </ul> | <ul style="list-style-type: none"> <li>• x1 Buccal mucosa</li> <li>• x1 Floor of the mouth <ul style="list-style-type: none"> <li>• x16 Gingiva</li> </ul> </li> <li>• x15 Tongue</li> <li>• x16 Lip</li> </ul> | <ul style="list-style-type: none"> <li>• x16 erythema</li> <li>• x16 Angular Cheilitis</li> </ul> | <ul style="list-style-type: none"> <li>• x2 Cardiovascular disease</li> <li>• x1 Polycythemia vera,</li> <li>• x1 Arthritis</li> <li>• x1 Low hemoglobin</li> <li>• x1 Allergies</li> </ul> | <ul style="list-style-type: none"> <li>• Dense plasma cell-rich infiltrate</li> </ul>                                                                                                  | NA |
| Baughman et al./ 1974      | 67/F            | <ul style="list-style-type: none"> <li>• Pain</li> </ul>                            | <ul style="list-style-type: none"> <li>• Lip</li> </ul>                                                                                                                                                         | <ul style="list-style-type: none"> <li>• Edema</li> </ul>                                         | <ul style="list-style-type: none"> <li>• Mild degenerative arthritis</li> <li>• Hypertension</li> </ul>                                                                                     | <ul style="list-style-type: none"> <li>• Acanthosis</li> <li>• Elongated rete pegs</li> <li>• Spongiosis</li> <li>• Exocytosis</li> <li>• Dense plasma cell-rich infiltrate</li> </ul> | NA |

|                  |      |                                                                                                  |                                                                                                                                         |                                                                                                                                          |                                                                                                            |                                                                                                                                                                                       |    |
|------------------|------|--------------------------------------------------------------------------------------------------|-----------------------------------------------------------------------------------------------------------------------------------------|------------------------------------------------------------------------------------------------------------------------------------------|------------------------------------------------------------------------------------------------------------|---------------------------------------------------------------------------------------------------------------------------------------------------------------------------------------|----|
| Kerr et al./1971 | 59/F | <ul style="list-style-type: none"> <li>• Burning</li> <li>• Swelling</li> </ul>                  | <ul style="list-style-type: none"> <li>• Gingiva</li> <li>• Lip</li> </ul>                                                              | <ul style="list-style-type: none"> <li>• Angular cheilitis</li> <li>• Swelling</li> </ul>                                                | <ul style="list-style-type: none"> <li>• Carcinoma of the endometrium</li> </ul>                           | <ul style="list-style-type: none"> <li>• Papillar epithelial hyperplasia</li> <li>• Dense plasma cell-rich infiltrate</li> <li>• Dilated capillaries</li> <li>• Mast cells</li> </ul> | NA |
|                  | 27/F | <ul style="list-style-type: none"> <li>• Pain</li> <li>• Dysphagia</li> </ul>                    | <ul style="list-style-type: none"> <li>• Gingiva</li> <li>• Palate</li> <li>• Lip</li> <li>• Buccal mucosa</li> <li>• Tongue</li> </ul> | <ul style="list-style-type: none"> <li>• Angular cheilitis</li> <li>• Secondary impetigo</li> <li>• Edema</li> <li>• Erythema</li> </ul> | NA                                                                                                         | <ul style="list-style-type: none"> <li>• Papillar epithelial hyperplasia</li> <li>• Dense plasma cell-rich infiltrate</li> <li>• Dilated capillaries</li> <li>• Mast cells</li> </ul> | NA |
|                  | 11/F | <ul style="list-style-type: none"> <li>• Pain</li> <li>• Swelling</li> <li>• Bleeding</li> </ul> | <ul style="list-style-type: none"> <li>• Gingiva</li> <li>• Lip</li> <li>• Oropharynx</li> </ul>                                        | <ul style="list-style-type: none"> <li>• Angular cheilitis</li> <li>• Secondary impetigo</li> </ul>                                      | <ul style="list-style-type: none"> <li>• Frequent upper respiratory infections</li> <li>• Ashma</li> </ul> | <ul style="list-style-type: none"> <li>• Papillar epithelial hyperplasia</li> </ul>                                                                                                   | NA |

|  |      |                                                                                                  |                                                                                                                       |                                                                                                                                                                                 |                                                                         |                                                                                                                                                                                       |    |
|--|------|--------------------------------------------------------------------------------------------------|-----------------------------------------------------------------------------------------------------------------------|---------------------------------------------------------------------------------------------------------------------------------------------------------------------------------|-------------------------------------------------------------------------|---------------------------------------------------------------------------------------------------------------------------------------------------------------------------------------|----|
|  |      |                                                                                                  | <ul style="list-style-type: none"> <li>• Tongue</li> </ul>                                                            | <ul style="list-style-type: none"> <li>• Fissured tongue and lip</li> <li>• Edema</li> <li>• Erythema</li> <li>• Gingival</li> <li>• Hyperplasia</li> <li>• Swelling</li> </ul> |                                                                         | <ul style="list-style-type: none"> <li>• Dense plasma cell-rich infiltrate</li> <li>• Dilated capillaries</li> <li>• Mast cells</li> </ul>                                            |    |
|  | 28/F | <ul style="list-style-type: none"> <li>• Pain</li> <li>• Bleeding</li> <li>• Swelling</li> </ul> | <ul style="list-style-type: none"> <li>• Gingiva</li> <li>• Lip</li> <li>• Oropharynx</li> </ul>                      | <ul style="list-style-type: none"> <li>• Angular cheilitis</li> <li>• Fissured lip</li> <li>• Swelling</li> <li>• Edema</li> <li>• Erythema</li> </ul>                          | <ul style="list-style-type: none"> <li>• Angioneurotic edema</li> </ul> | <ul style="list-style-type: none"> <li>• Papillar epithelial hyperplasia</li> <li>• Dense plasma cell-rich infiltrate</li> <li>• Dilated capillaries</li> <li>• Mast cells</li> </ul> | NA |
|  | 27/M | <ul style="list-style-type: none"> <li>• Pain</li> <li>• Bleeding</li> <li>• Swelling</li> </ul> | <ul style="list-style-type: none"> <li>• Gingiva</li> <li>• Lip</li> <li>• Tongue</li> <li>• Buccal mucosa</li> </ul> | <ul style="list-style-type: none"> <li>• Edema</li> <li>• Angular cheilitis</li> <li>• Secondary impetigo</li> </ul>                                                            | NA                                                                      | <ul style="list-style-type: none"> <li>• Papillar epithelial hyperplasia</li> </ul>                                                                                                   | NA |

|  |      |                                                                               |                                                                                                                       |                                                                                                                                                          |                                                             |                                                                                                                                                                                       |    |
|--|------|-------------------------------------------------------------------------------|-----------------------------------------------------------------------------------------------------------------------|----------------------------------------------------------------------------------------------------------------------------------------------------------|-------------------------------------------------------------|---------------------------------------------------------------------------------------------------------------------------------------------------------------------------------------|----|
|  |      |                                                                               |                                                                                                                       | <ul style="list-style-type: none"> <li>• Erythema</li> <li>• Swelling</li> </ul>                                                                         |                                                             | <ul style="list-style-type: none"> <li>• Dense plasma cell-rich infiltrate</li> <li>• Dilated capillaries</li> <li>• Mast cells</li> </ul>                                            |    |
|  | 18/F | <ul style="list-style-type: none"> <li>• Pain</li> </ul>                      | <ul style="list-style-type: none"> <li>• Gingiva</li> <li>• Lip</li> <li>• Tongue</li> </ul>                          | <ul style="list-style-type: none"> <li>• Erythema</li> <li>• Angular cheilitis</li> <li>• Fissured lip</li> <li>• Tongue atrophy</li> </ul>              | <ul style="list-style-type: none"> <li>• Allergy</li> </ul> | <ul style="list-style-type: none"> <li>• Papillar epithelial hyperplasia</li> <li>• Dense plasma cell-rich infiltrate</li> <li>• Dilated capillaries</li> <li>• Mast cells</li> </ul> | NA |
|  | 24/F | <ul style="list-style-type: none"> <li>• Pain</li> <li>• Dysphagia</li> </ul> | <ul style="list-style-type: none"> <li>• Gingiva</li> <li>• Lip</li> <li>• Tongue</li> <li>• Buccal mucosa</li> </ul> | <ul style="list-style-type: none"> <li>• Angular cheilitis</li> <li>• Fissured lip</li> <li>• Fissured tongue</li> <li>• Gingival Hyperplasia</li> </ul> | NA                                                          | <ul style="list-style-type: none"> <li>• Papilalr epithelial hyperplasia</li> <li>• Dense plasma cell-rich infiltrate</li> </ul>                                                      | NA |

|              |      |                                                                                                  |                                                                                              |                                                                                                                                                           |                                                                                          |                                                                                                                                                                                      |    |
|--------------|------|--------------------------------------------------------------------------------------------------|----------------------------------------------------------------------------------------------|-----------------------------------------------------------------------------------------------------------------------------------------------------------|------------------------------------------------------------------------------------------|--------------------------------------------------------------------------------------------------------------------------------------------------------------------------------------|----|
|              |      |                                                                                                  |                                                                                              | <ul style="list-style-type: none"> <li>• Erythema</li> </ul>                                                                                              |                                                                                          | <ul style="list-style-type: none"> <li>• Dilated capillaries</li> <li>• Mast cells</li> </ul>                                                                                        |    |
|              | 21/M | <ul style="list-style-type: none"> <li>• Pain</li> <li>• Bleeding</li> </ul>                     | <ul style="list-style-type: none"> <li>• Gingiva</li> <li>• Tongue</li> <li>• Lip</li> </ul> | <ul style="list-style-type: none"> <li>• Angular cheilitis</li> <li>• Fissured lip</li> <li>• Fissured tongue</li> <li>• Erythema</li> </ul>              | NA                                                                                       | <ul style="list-style-type: none"> <li>• Papilar epithelial hyperplasia</li> <li>• Dense plasma cell-rich infiltrate</li> <li>• Dilated capillaries</li> <li>• Mast cells</li> </ul> | NA |
| Owings/ 1969 | 26/F | <ul style="list-style-type: none"> <li>• Pain</li> <li>• Bleeding</li> <li>• Swelling</li> </ul> | <ul style="list-style-type: none"> <li>• Gingiva</li> <li>• Tongue</li> <li>• Lip</li> </ul> | <ul style="list-style-type: none"> <li>• Edema</li> <li>• Erythema</li> <li>• Angular cheilitis</li> <li>• Fissured tongue</li> <li>• Swelling</li> </ul> | NA                                                                                       | <ul style="list-style-type: none"> <li>• Epithelial hyperplasia</li> <li>• Dense plasma cell-rich infiltrate</li> <li>• Exocytosis</li> </ul>                                        | NA |
|              | 47/F | <ul style="list-style-type: none"> <li>• Pain</li> </ul>                                         | <ul style="list-style-type: none"> <li>• Gingiva</li> <li>• Tongue</li> <li>• Lip</li> </ul> | <ul style="list-style-type: none"> <li>• Erythema</li> <li>• Angular Cheilitis</li> </ul>                                                                 | <ul style="list-style-type: none"> <li>• Arthritis</li> <li>• Thyroid disease</li> </ul> | <ul style="list-style-type: none"> <li>• Dense plasma cell-rich infiltrate</li> </ul>                                                                                                | NA |



|                |      |                                                                               |                                                                                              |                                                                                                                                       |                                                                   |                                                                                                                                                                                                                              |    |
|----------------|------|-------------------------------------------------------------------------------|----------------------------------------------------------------------------------------------|---------------------------------------------------------------------------------------------------------------------------------------|-------------------------------------------------------------------|------------------------------------------------------------------------------------------------------------------------------------------------------------------------------------------------------------------------------|----|
|                |      |                                                                               |                                                                                              |                                                                                                                                       |                                                                   | <ul style="list-style-type: none"> <li>• Edema</li> <li>• Atrophy</li> </ul>                                                                                                                                                 |    |
|                | 44/F | <ul style="list-style-type: none"> <li>• Pain</li> <li>• Dysphagia</li> </ul> | <ul style="list-style-type: none"> <li>• Gingiva</li> <li>• Tongue</li> <li>• Lip</li> </ul> | <ul style="list-style-type: none"> <li>• Edema</li> <li>• Erythema</li> <li>• Fissured tongue</li> <li>• Angular Cheilitis</li> </ul> | <ul style="list-style-type: none"> <li>• Ovarian cyst</li> </ul>  | <ul style="list-style-type: none"> <li>• Epithelial hyperplasia</li> <li>• Parakeratosis</li> <li>• Elongated rete pegs</li> <li>• Dense plasma cell-rich infiltrate</li> <li>• Mast cells</li> <li>• Lymphocytes</li> </ul> | NA |
| Poswillo /1968 | 37/F | <ul style="list-style-type: none"> <li>• Swelling</li> </ul>                  | <ul style="list-style-type: none"> <li>• Gingiva</li> </ul>                                  | <ul style="list-style-type: none"> <li>• Hyperplasia</li> </ul>                                                                       | NA                                                                | <ul style="list-style-type: none"> <li>• Acanthosis</li> <li>• Dense plasma cell-rich infiltrate</li> </ul>                                                                                                                  | NA |
|                | 39/F | <ul style="list-style-type: none"> <li>• Asymptomatic</li> </ul>              | <ul style="list-style-type: none"> <li>• Gingiva</li> </ul>                                  | <ul style="list-style-type: none"> <li>• Gingival hypertrophy</li> </ul>                                                              | NA                                                                | <ul style="list-style-type: none"> <li>• Acanthosis</li> <li>• Dense plasma cell-rich infiltrate</li> </ul>                                                                                                                  | NA |
|                | 21/F | <ul style="list-style-type: none"> <li>• Asymptomatic</li> </ul>              | <ul style="list-style-type: none"> <li>• Gingiva</li> </ul>                                  | <ul style="list-style-type: none"> <li>• Hyperplasia</li> </ul>                                                                       | <ul style="list-style-type: none"> <li>• Down syndrome</li> </ul> | <ul style="list-style-type: none"> <li>• Acanthosis</li> </ul>                                                                                                                                                               | NA |

|                         |      |                                                                                                                           |                                                                                                                                         |                                                                                                                                            |                                                                                                |                                                                                                                               |                  |
|-------------------------|------|---------------------------------------------------------------------------------------------------------------------------|-----------------------------------------------------------------------------------------------------------------------------------------|--------------------------------------------------------------------------------------------------------------------------------------------|------------------------------------------------------------------------------------------------|-------------------------------------------------------------------------------------------------------------------------------|------------------|
|                         |      |                                                                                                                           | <ul style="list-style-type: none"> <li>• Buccal mucosa</li> </ul>                                                                       | <ul style="list-style-type: none"> <li>• Gingival hypertrophy</li> </ul>                                                                   |                                                                                                | <ul style="list-style-type: none"> <li>• Dense plasma cell-rich infiltrate</li> </ul>                                         |                  |
| Lightstone et al. /1960 | 45/M | <ul style="list-style-type: none"> <li>• Xerostomia</li> <li>• Asthenia</li> <li>• Bleeding</li> <li>• Pain</li> </ul>    | <ul style="list-style-type: none"> <li>• Lip</li> <li>• Oropharynx</li> </ul>                                                           | <ul style="list-style-type: none"> <li>• Erosion/Ulcration</li> </ul>                                                                      | <ul style="list-style-type: none"> <li>• Multiple myeloma</li> </ul>                           | <ul style="list-style-type: none"> <li>• Edema</li> <li>• Dense plasma cell-rich infiltrate</li> <li>• Lymphocytes</li> </ul> | NA               |
| Micucci et al./2021     | 57/M | <ul style="list-style-type: none"> <li>• Bleeding</li> <li>• Pain</li> </ul>                                              | <ul style="list-style-type: none"> <li>• Palate</li> </ul>                                                                              | <ul style="list-style-type: none"> <li>• Erythema/Ulcration</li> </ul>                                                                     | <ul style="list-style-type: none"> <li>• Dermatitis</li> <li>• Eczema</li> </ul>               | <ul style="list-style-type: none"> <li>• Dense plasma cell-rich infiltrate</li> </ul>                                         | Normal k:λ ratio |
| Cohen et al./2021       | 80/M | <ul style="list-style-type: none"> <li>• Bleeding</li> <li>• Pain</li> <li>• Burning</li> </ul>                           | <ul style="list-style-type: none"> <li>• Lip</li> </ul>                                                                                 | <ul style="list-style-type: none"> <li>• Erythema/Ulcration</li> <li>• Secondary impetigo</li> <li>• Cheilitis</li> </ul>                  | <ul style="list-style-type: none"> <li>• Myelodysplastic Syndrome</li> <li>• Anemia</li> </ul> | <ul style="list-style-type: none"> <li>• Dense plasma cell-rich infiltrate</li> <li>• Lymphocytes</li> </ul>                  | Normal k:λ ratio |
| Tailor et al./2021      | 47/M | <ul style="list-style-type: none"> <li>• Burning</li> <li>• Bleeding</li> <li>• Dysphonia</li> <li>• Dysphagia</li> </ul> | <ul style="list-style-type: none"> <li>• Lip</li> <li>• Buccal mucosa</li> <li>• Palate</li> <li>• Gingiva</li> <li>• Tongue</li> </ul> | <ul style="list-style-type: none"> <li>• Erythema/Ulcration</li> <li>• Desquamative gingivitis</li> <li>• Cobbleston appearance</li> </ul> | <ul style="list-style-type: none"> <li>• Schizophrenia</li> </ul>                              | <ul style="list-style-type: none"> <li>• Dense plasma cell-rich infiltrate</li> </ul>                                         | Normal k:λ ratio |

|                    |      |                                                                                  |                                                                               |                                                                                                                                         |                                                                                      |                                                                                                                                                                                                   |    |
|--------------------|------|----------------------------------------------------------------------------------|-------------------------------------------------------------------------------|-----------------------------------------------------------------------------------------------------------------------------------------|--------------------------------------------------------------------------------------|---------------------------------------------------------------------------------------------------------------------------------------------------------------------------------------------------|----|
|                    |      |                                                                                  |                                                                               | <ul style="list-style-type: none"> <li>• Fissured tongue</li> <li>• Secondary impetigo</li> </ul>                                       |                                                                                      |                                                                                                                                                                                                   |    |
|                    | 39/M | <ul style="list-style-type: none"> <li>• Pain</li> </ul>                         | <ul style="list-style-type: none"> <li>• Palate</li> <li>• Gingiva</li> </ul> | <ul style="list-style-type: none"> <li>• Erythema/Ulceration</li> </ul>                                                                 | NA                                                                                   | <ul style="list-style-type: none"> <li>• Edema</li> <li>• Dense plasma cell-rich infiltrate</li> </ul>                                                                                            | NA |
| Vishnu et al./2020 | 13/F | <ul style="list-style-type: none"> <li>• Swelling</li> <li>• Bleeding</li> </ul> | <ul style="list-style-type: none"> <li>• Gingiva</li> </ul>                   | <ul style="list-style-type: none"> <li>• Erythema</li> <li>• Edema</li> <li>• Pseudo-pockets</li> <li>• Gingival hypertrophy</li> </ul> | NA                                                                                   | <ul style="list-style-type: none"> <li>• Epithelial hyperplasia</li> <li>• Dense plasma cell-rich infiltrate</li> <li>• Dilated capillaries</li> <li>• Lymphocytes</li> <li>• Fibrosis</li> </ul> | NA |
| Ketkar et al./2021 | 24/F | <ul style="list-style-type: none"> <li>• Swelling</li> <li>• Bleeding</li> </ul> | <ul style="list-style-type: none"> <li>• Gingiva</li> </ul>                   | <ul style="list-style-type: none"> <li>• Desquamative gingivitis</li> <li>• Pseudo-pockets</li> </ul>                                   | <ul style="list-style-type: none"> <li>• Asymptomatic patchy skin lesions</li> </ul> | <ul style="list-style-type: none"> <li>• Dense plasma cell-rich infiltrate</li> </ul>                                                                                                             | NA |

|                    |      |                                                                                                  |                                                             |                                                                                     |                                                                                                                                                                                                 |                                                                                                                                                                                 |                  |
|--------------------|------|--------------------------------------------------------------------------------------------------|-------------------------------------------------------------|-------------------------------------------------------------------------------------|-------------------------------------------------------------------------------------------------------------------------------------------------------------------------------------------------|---------------------------------------------------------------------------------------------------------------------------------------------------------------------------------|------------------|
|                    |      |                                                                                                  |                                                             | <ul style="list-style-type: none"> <li>• Swelling</li> </ul>                        |                                                                                                                                                                                                 | <ul style="list-style-type: none"> <li>• Dilated capillaries</li> <li>• Parakeratosis</li> </ul>                                                                                |                  |
| Genet et al.,/2021 | 61/F | <ul style="list-style-type: none"> <li>• Swelling</li> <li>• Bleeding</li> <li>• Pain</li> </ul> | <ul style="list-style-type: none"> <li>• Gingiva</li> </ul> | <ul style="list-style-type: none"> <li>• Edema</li> <li>• Swelling</li> </ul>       | <ul style="list-style-type: none"> <li>• IgG kappa multiple myeloma (MM) in complete remission</li> <li>• Hypothyroidism</li> <li>• Primary Sjögren's syndrome</li> <li>• Depression</li> </ul> | <ul style="list-style-type: none"> <li>• Dense plasma cell-rich infiltrate</li> </ul>                                                                                           | Normal k:λ ratio |
| Lu et al., /2020   | 15/M | <ul style="list-style-type: none"> <li>• Swelling</li> <li>• Bleeding</li> <li>• Pain</li> </ul> | <ul style="list-style-type: none"> <li>• Gingiva</li> </ul> | <ul style="list-style-type: none"> <li>• Exophytic, pedunculated, lesion</li> </ul> | NA                                                                                                                                                                                              | <ul style="list-style-type: none"> <li>• Epithelial hyperplasia</li> <li>• Dense plasma cell-rich infiltrate</li> <li>• Russel bodies</li> <li>• Dilated capillaries</li> </ul> | Normal k:λ ratio |

|                          |      |                                                                                                     |                                                                            |                                                                                                                                         |                                                                                |                                                                                                                                               |                  |
|--------------------------|------|-----------------------------------------------------------------------------------------------------|----------------------------------------------------------------------------|-----------------------------------------------------------------------------------------------------------------------------------------|--------------------------------------------------------------------------------|-----------------------------------------------------------------------------------------------------------------------------------------------|------------------|
| Konidena et.,/2014       | 28/M | <ul style="list-style-type: none"> <li>• Swelling</li> <li>• Bleeding</li> </ul>                    | <ul style="list-style-type: none"> <li>• Gingiva</li> </ul>                | <ul style="list-style-type: none"> <li>• Gingival hypertrophy</li> </ul>                                                                | <ul style="list-style-type: none"> <li>• Muscular dystrophy type II</li> </ul> | <ul style="list-style-type: none"> <li>• Dense plasma cell-rich infiltrate</li> </ul>                                                         | NA               |
| Shivalingu et al., /2016 | 12/F | <ul style="list-style-type: none"> <li>• Swelling</li> <li>• Bleeding</li> <li>• Burning</li> </ul> | <ul style="list-style-type: none"> <li>• Gingiva</li> </ul>                | <ul style="list-style-type: none"> <li>• Erythema</li> <li>• Edema</li> <li>• Desquamative gingivitis</li> </ul>                        | NA                                                                             | <ul style="list-style-type: none"> <li>• Dense plasma cell-rich infiltrate</li> </ul>                                                         | NA               |
| Negi et al.,/2019        | 12/M | <ul style="list-style-type: none"> <li>• Swelling</li> <li>• Bleeding</li> </ul>                    | <ul style="list-style-type: none"> <li>• Gingiva</li> </ul>                | <ul style="list-style-type: none"> <li>• Erythema</li> <li>• Edema</li> <li>• Pseudo-pockets</li> </ul>                                 | NA                                                                             | <ul style="list-style-type: none"> <li>• Epithelial hyperplasia</li> <li>• Parakeratosis</li> </ul>                                           | Normal k:λ ratio |
| Chauhan et al.,/2019     | 18/M | <ul style="list-style-type: none"> <li>• Swelling</li> <li>• Bleeding</li> </ul>                    | <ul style="list-style-type: none"> <li>• Gingiva</li> <li>• Lip</li> </ul> | <ul style="list-style-type: none"> <li>• Swelling</li> <li>• Edema</li> <li>• Gingival hypertrophy</li> <li>• Pseudo-pockets</li> </ul> | NA                                                                             | <ul style="list-style-type: none"> <li>• Dense plasma cell-rich infiltrate</li> <li>• Parakeratosis</li> <li>• Elongated rete pegs</li> </ul> | Normal k:λ ratio |

|                         |      |                                                                                                                                               |                                                                               |                                                                                                             |                |                                                                                                                                                                             |                 |
|-------------------------|------|-----------------------------------------------------------------------------------------------------------------------------------------------|-------------------------------------------------------------------------------|-------------------------------------------------------------------------------------------------------------|----------------|-----------------------------------------------------------------------------------------------------------------------------------------------------------------------------|-----------------|
|                         |      |                                                                                                                                               |                                                                               |                                                                                                             |                | • Lymphocytes                                                                                                                                                               |                 |
| Antonelli et al., /2020 | 14/F | <ul style="list-style-type: none"> <li>• Pain</li> <li>• Burning</li> <li>• Dysgeusia</li> <li>• Hoarseness</li> <li>• Sore throat</li> </ul> | <ul style="list-style-type: none"> <li>• Tongue</li> <li>• Gingiva</li> </ul> | <ul style="list-style-type: none"> <li>• Edema</li> <li>• Erythema</li> <li>• Ulceration</li> </ul>         | NA             | <ul style="list-style-type: none"> <li>• Dense plasma cell-rich infiltrate</li> </ul>                                                                                       | k:λ ratio= k> λ |
| Gasparro et al./2019    | 78/F | <ul style="list-style-type: none"> <li>• Pain</li> </ul>                                                                                      | <ul style="list-style-type: none"> <li>• Buccal mucosa</li> </ul>             | <ul style="list-style-type: none"> <li>• Erythema</li> <li>• Erosion</li> <li>• Ulceration</li> </ul>       | • Hypertension | <ul style="list-style-type: none"> <li>• Dense plasma cell-rich infiltrate</li> </ul>                                                                                       | NA              |
| Macleod et al., /1989   | 47 M | <ul style="list-style-type: none"> <li>• Bleeding</li> </ul>                                                                                  | <ul style="list-style-type: none"> <li>• Gingiva</li> </ul>                   | <ul style="list-style-type: none"> <li>• Hyperplasia</li> <li>• Erythema</li> <li>• Desquamation</li> </ul> | • Hayfever     | <ul style="list-style-type: none"> <li>• Edema</li> <li>• Dense plasma cell-rich infiltrate</li> <li>• Dilated capillaries</li> <li>• Neutrophilic micro-abscess</li> </ul> | k:λ ratio= k> λ |
